# Supplementary material for: Impact of Histone H4 Lysine 20 Methylation on 53BP1 Responses to Chromosomal Double Strand Breaks
Source: PubMed Central journal article supplement (PMC3509127; doi:10.1371/journal.pone.0049211), 2012-11-28
Supplement: pone.0049211.s006.pdf [file pone.0049211.s006.pdf]

**Hartlerode et al., Table S1.**

| <b>Cell type</b> | <b>Mean laser power (mW)</b> | <b>Response</b> |
|------------------|------------------------------|-----------------|
| No BrdU          | 10                           | 0/5             |
|                  | 15                           | 4/5             |
|                  | 20                           | 5/5             |
|                  | 25                           | 4/5             |
|                  | 50                           | 4/5             |
| + BrdU           | 2                            | 0/3             |
|                  | 5                            | 3/3             |
|                  | 10                           | 3/3             |
|                  | 20                           | 3/3             |
